# Supplementary material for: Mucosa-Associated Lymphoid Tissue Lymphoma Translocation Protein 1 Positively Modulates Matrix Metalloproteinase-9 Production in Alveolar Macrophages upon Toll-Like Receptor 7 Signaling and Influenza Virus Infection
Source: PubMed Central journal article supplement (PMC5614920; doi:10.3389/fimmu.2017.01177), 2017-09-22
Supplement: Data_Sheet_1.pdf [file Data_Sheet_1.pdf]

## Supplementary Material

# Mucosa-Associated Lymphoid Tissue Lymphoma Translocation Protein 1 Positively Modulates Matrix Metalloproteinase-9 Production in Alveolar Macrophages upon Toll-Like Receptor 7 Signaling and Influenza Virus Infection

Yu-Hsiang Lee, Juin-Hua Huang, Tzu-Hsuan Chang, Hung-Chih Yang, and Betty A. Wu-Hsieh\*

\* Correspondence:

Betty A. Wu-Hsieh

bwh@ntu.edu.tw

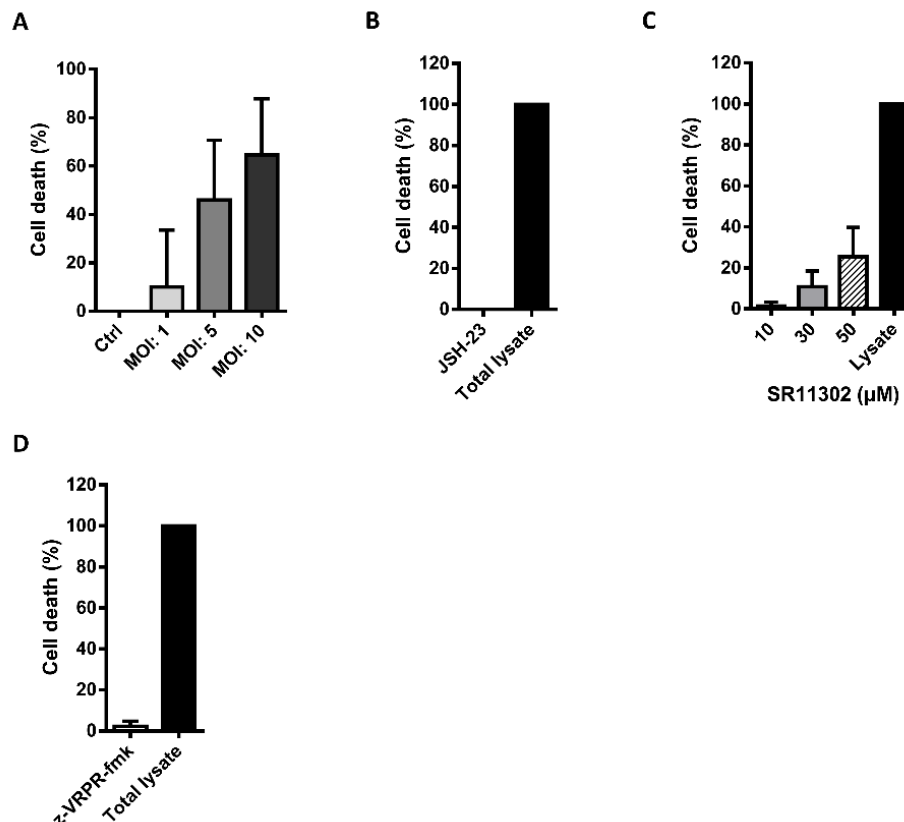

**Supplementary Figure 1.** Percent cell death of cells cultured in inhibitors and after IAV infection. MH-S cells were treated with (A) different MOI of HKx31 virus as indicated for 48 h, (B) 30  $\mu$ M of JSH-23 for 24 h, (C) different concentrations of SR11302 for 19 h and (D) 100  $\mu$ M of z-VRPR-fmk for 24 h. Culture medium and total cell lysate were collected after incubation and applied to LDH cytotoxicity assay.
